# Supplementary material
Source: MDPI journal article supplement (https://www.mdpi.com/1424-2818/13/10/496)
Supplement: s1 [file s1]

**Table S1** Haplogroup diversity in the Thai population (based on classification of HVI and HVII sequence data).

| Region and mutation site |       |            |                                                         |                                            |  |
|--------------------------|-------|------------|---------------------------------------------------------|--------------------------------------------|--|
| No.                      | Code* | Haplogroup | 16024-16365 HV1                                         | 73-340 HV2                                 |  |
| TH001                    | C179  | M12b2      | 16129A 16172C 16223T 16290T 16305G 16325C 16354T        | 73G 152C 153G 263G 309.1C 315.1C           |  |
| TH002                    | N187  | A          | 16189C 16223T 16263C 16288C 16290T 16319A               | 73G 151T 152C 235G 263G 309.1C 315.1C      |  |
| TH003                    | C313  | A5b1       | 16126C 16186T 16223T 16235G 16290T 16319A               | 73G 152C 235G 263G 315.1C                  |  |
| TH004                    | N195  | A4         | 16223T 16274A 16290T 16319A 16362C                      | 73G 152C 235G 263G 309.1C 315.1C           |  |
| TH005                    | C274  | A4         | 16129A 16223T 16290T 16291T 16319A 16362C               | 73G 152C 235G 263G 315.1C                  |  |
| TH006                    | N211  | A4         | 16166G 16223T 16290T 16319A 16362C                      | 73G 152C 200G 204C 235G 263G 309.1C 315.1C |  |
| TH007                    | N218  | A4         | 16166G 16223T 16290T 16319A 16362C                      | 73G 152C 200G 235G 263G 309.1C 315.1C      |  |
| TH008                    | N241  | A4         | 16166G 16223T 16290T 16319A 16362C                      | 73G 152C 200G 235G 263G 309.1C 315.1C      |  |
| TH009                    | NE264 | A4d        | 16223T 16290T 16319A 16362C                             | 73G 151T 152C 200G 235G 263G 315.1C        |  |
| TH010                    | C182  | M          | 16183C 16189C 16209C 16223T                             | 73G 263G 309.1C 309.2C 315.1C              |  |
| TH011                    | N198  | B6a1a      | 16051G 16183C 16189C 16354T                             | 73G 263G 315.1C                            |  |
| TH012                    | S300  | M12a1b     | 16155G 16172C 16182C 16183C 16189C 16223T 16234T 16290T | 73G 125C 127C 263G 315.1C                  |  |
| TH013                    | C23   | B4a1       | 16182C 16183C 16189C 16217C                             | 73G 146C 263G 309.1C 309.2C 315.1C         |  |
| TH014                    | C24   | B4a1       | 16182C 16183C 16189C 16217C 16261T 16299G               | 73G 193G 263G 309.1C 309.2C 315.1C         |  |
| TH015                    | NE103 | B4a1       | 16182C 16183C 16189C 16217C 16240G 16261T               | 73G 263G 315.1C                            |  |
| TH016                    | S130  | B2g        | 16189C 16217C 16223T 16319A                             | 73G 114G 131C 195A 263G 315.1C             |  |
| TH017                    | N204  | B4         | 16129A 16182C 16183C 16189C 16217C 16262T               | 73G 263G 272G 309.1C 309.2C 315.1C         |  |
| TH018                    | S42   | B4a1a      | 16182C 16183C 16189C 16217C 16261T 16355T               | 73G 146C 263G 309.1C 309.2C 315.1C         |  |
| TH019                    | S51   | B4a1a      | 16182C 16183C 16189C 16217C 16218T 16224C 16261T 16304C | 73G 146C 152C 263G 315.1C                  |  |
| TH020                    | S168  | B4a1a      | 16168T 16182C 16183C 16189C 16217C 16261T 16311C        | 73G 146C 263G 309.1C 309.2C 315.1C         |  |
| TH021                    | C181  | B4a1a      | 16093C 16182C 16183C 16188T 16189C 16214T 16217C 16261T | 73G 146C 263G 309.1C 315.1C                |  |
| TH022                    | N194  | B4a1a      | 16129A 16182C 16183C 16189C 16217C 16261T               | 73G 146C 263G 309.1C 309.2C 315.1C         |  |
| TH023                    | C312  | B4a1a      | 16093C 16125A 16182C 16183C 16189C 16217C 16261T        | 73G 146C 263G 309.1C 315.1C                |  |
| TH024                    | N141  | B4b1       | 16136C 16182C 16183C 16189C 16217C 16270T 16298C        | 73G 150T 152C 263G 310C                    |  |
| TH025                    | N247  | B4b1       | 16136C 16183C 16189C 16217C                             | 73G 199C 263G 315.1C                       |  |
| TH026                    | N239  | B4b1a2a    | 16136C 16182C 16183C 16189C 16217C 16309G 16354T        | 73G 207A 263G 315.1C                       |  |
| TH027                    | S32   | B4c1b2a    | 16140C 16182C 16183C 16189C 16217C 16274A 16311C 16335G | 73G 146C 150T 263G 309.1C 309.2C 315.1C    |  |
| TH028                    | S132  | B4c1b2a    | 16140C 16182C 16183C 16189C 16217C 16274A 16311C 16335G | 73G 146C 150T 263G 309.1C 309.2C 315.1C    |  |
| TH029                    | S33   | B4c2       | 16147T 16183C 16184A 16189C 16217C 16235G               | 73G 263G 309.1C 315.1C                     |  |
| TH030                    | S41   | B4c2       | 16147T 16183C 16184A 16189C 16217C 16235G               | 73G 263G 309.1C 315.1C                     |  |
| TH031                    | S68   | B4c2       | 16147T 16183C 16184A 16189C 16217C 16235G               | 73G 263G 309.1C 315.1C                     |  |
| TH032                    | NE82  | B4c2       | 16147T 16183C 16184A 16189C 16217C 16235G               | 73G 114G 152C 263G 309.1C 315.1C           |  |

| Region and mutation site |       |            |                                                                          |                                         |  |
|--------------------------|-------|------------|--------------------------------------------------------------------------|-----------------------------------------|--|
| No.                      | Code* | Haplogroup | 16024-16365 HV1                                                          | 73-340 HV2                              |  |
| TH033                    | NE149 | B4c2       | 16147T 16183C 16184A 16189C 16217C 16235G                                | 73G 263G 315.1C                         |  |
| TH034                    | NE157 | B4c2       | 16147T 16183C 16184A 16189C 16217C 16235G<br>16295T                      | 73G 263G 315.1C                         |  |
| TH035                    | C162  | B4c2       | 16147T 16183C 16184A 16189C 16217C 16235G<br>16311C                      | 73G 185A 189G 263G 309.1C 315.1C        |  |
| TH036                    | N206  | B4c2       | 16147T 16183C 16184A 16189C 16217C 16235G                                | 73G 152C 195C 263G 309.1C 315.1C        |  |
| TH037                    | NE268 | B4c2       | 16147T 16183C 16184A 16189C 16217C 16235G                                | 73G 150T 263G 309.1C 315.1C             |  |
| TH038                    | NE120 | B4g        | 16181C 16182C 16183C 16189C 16213A 16217C<br>16261T 16292T               | 73G 263G 309.1C 315.1C                  |  |
| TH039                    | NE140 | B4g        | 16181C 16182C 16183C 16189C 16213A 16217C<br>16242T 16261T 16292T 16301T | 73G 150T 263G 308D 310D                 |  |
| TH040                    | NE265 | B4g        | 16181C 16182C 16183C 16189C 16213A 16217C<br>16261T 16292T               | 73G 263G 309.1C 315.1C                  |  |
| TH041                    | NE304 | B4g        | 16181C 16182C 16183C 16189C 16213A 16217C<br>16261T 16292T               | 73G 263G 309.1C 315.1C                  |  |
| TH042                    | N27   | B5a        | 16140C 16183C 16189C 16266A                                              | 73G 146C 210G 263G 315.1C               |  |
| TH043                    | C28   | B5a        | 16140C 16183C 16189C 16266A                                              | 73G 146C 210G 263G 309.1C 309.2C 315.1C |  |
| TH044                    | S30   | B5a        | 16140C 16182C 16183C 16189C 16266A                                       | 73G 210G 234G 263G 309.1C 315.1C        |  |
| TH045                    | S34   | B5a        | 16111T 16129A 16140C 16182C 16183C 16189C<br>16266A                      | 73G 146C 210G 263G 315.1C               |  |
| TH046                    | S54   | B5a        | 16140C 16182C 16183C 16189C 16266A                                       | 73G 210G 263G 309.1C 315.1C             |  |
| TH047                    | S60   | B5a        | 16140C 16183C 16189C 16266A 16362C                                       | 73G 146C 210G 263G 309.1C 315.1C        |  |
| TH048                    | NE62  | B5a        | 16093C 16140C 16183C 16189C 16243C 16266A                                | 73G 210G 263G 315.1C                    |  |
| TH049                    | S74   | B5a        | 16140C 16183C 16189C 16266A 16362C                                       | 73G 146C 210G 263G 309.1C 315.1C        |  |
| TH050                    | NE85  | B5a        | 16140C 16182C 16183C 16189C 16266A                                       | 73G 210G 263G 307D 310D 311D            |  |
| TH051                    | C106  | B5a        | 16140C 16183C 16189C 16192T 16266A                                       | 73G 210G 263G 315.1C                    |  |
| TH052                    | C108  | B5a        | 16183C 16189C 16266A 16298C                                              | 73G 210G 263G 309.1C 309.2C 315.1C      |  |
| TH053                    | N136  | B5a        | 16140C 16183C 16189C 16266A 16294T                                       | 73G 149Y 185A 189G 263G 309.1C 315.1C   |  |
| TH054                    | C147  | B5a        | 16140C 16183C 16189C 16266A                                              | 73G 210G 263G 309.1C 315.1C             |  |
| TH055                    | N188  | B5a        | 16140C 16183C 16189C 16266A                                              | 73G 195C 210G 263G 309.1C 309.2C 315.1C |  |
| TH056                    | N189  | B5a        | 16140C 16183C 16189C 16209C 16266A                                       | 73G 210G 263G 315.1C                    |  |
| TH057                    | NE279 | B5a        | 16140C 16148T 16183C 16189C 16266A 16326G                                | 73G 210G 263G 309.1C 309.2C 315.1C      |  |
| TH058                    | C280  | B5a        | 16140C 16183C 16189C 16193.1C 16266A                                     | 73G 210G 263G 309.1C 309.2C 315.1C      |  |
| TH059                    | S281  | B5a        | 16140C 16183C 16189C 16193.1C 16266A                                     | 73G 210G 263G 315.1C                    |  |
| TH060                    | C285  | B5a        | 16140C 16182C 16183C 16189C 16209C 16266A                                | 73G 210G 263G 310D 311D                 |  |
| TH061                    | NE298 | B5a        | 16140C 16183C 16189C 16193.1C 16266A                                     | 73G 210G 263G 309.1C 309.2C 315.1C      |  |
| TH062                    | NE314 | B5a        | 16140C 16183C 16189C 16193.1C 16266A                                     | 73G 210G 263G 309.1C 315.1C             |  |
| TH063                    | NE105 | B5a1d      | 16140C 16182C 16183C 16189C 16261T 16266A                                | 73G 152C 210G 263G 309.1C 309.2C 315.1C |  |
| TH064                    | S127  | B5a1d      | 16140C 16182C 16183C 16189C 16261T 16266A                                | 73G 152C 210G 263G 309.1C 315.1C        |  |
| TH065                    | N196  | B5a1d      | 16140C 16183C 16189C 16266A 16311C                                       | 73G 152C 210G 263G 309.1C 309.2C 315.1C |  |
| TH066                    | N238  | B5a1d      | 16140C 16183C 16189C 16266A 16312G                                       | 73G 152C 210G 263G 309.1C 315.1C        |  |
| TH067                    | C306  | B5a1d      | 16140C 16182C 16183C 16189C 16261T 16266A                                | 73G 152C 210G 263G 309.1C 315.1C        |  |
| TH068                    | NE8   | B5b        | 16140C 16178C 16183C 16189C 16243C 16311C                                | 73G 103A 204C 263G 309.1C 309.2C 315.1C |  |

| Region and mutation site |       |            |                                                  |                                         |  |
|--------------------------|-------|------------|--------------------------------------------------|-----------------------------------------|--|
| No.                      | Code* | Haplogroup | 16024-16365 HV1                                  | 73-340 HV2                              |  |
| TH069                    | NE167 | B5b        | 16140C 16183C 16189C 16243C 16311C               | 73G 204C 263G 309.1C 309.2C 315.1C      |  |
| TH070                    | S17   | D5b1d      | 16183C 16189C 16223T 16304C 16362C               | 73G 146C 150T 263G 315.1C               |  |
| TH071                    | N22   | M7a        | 16183C 16189C 16209C 16223T                      | 73G 150T 263G 309.1C 315.1C             |  |
| TH072                    | NE53  | D5         | 16182C 16183C 16189C 16223T 16362C               | 73G 150T 153G 263G 309.1C 309.2C 315.1C |  |
| TH073                    | C79   | D5b1c1     | 16148T 16182C 16183C 16189C 16223T 16287T 16362C | 73G 150T 152C 263G 309.1C 309.2C 315.1C |  |
| TH074                    | S131  | M51a2      | 16183C 16189C 16223T 16278T                      | 73G 150T 263G 309.1C 309.2C 315.1C      |  |
| TH075                    | S56   | C4a1       | 16223T 16298C 16327T                             | 73G 195C 249D 263G 309.1C 315.1C        |  |
| TH076                    | C78   | C4a3b      | 16223T 16298C 16311C 16327T 16357C               | 73G 249D 263G 310C                      |  |
| TH077                    | NE86  | C7a        | 16223T 16298C 16327T                             | 73G 249D 263G 315.1C                    |  |
| TH078                    | C112  | C7         | 16093C 16172C 16223T 16298C 16327T               | 73G 249D 263G 315.1C                    |  |
| TH079                    | C184  | C7a        | 16189C 16223T 16298C 16327T 16357C               | 73G 249D 263G 309.1C 309.2C 315.1C      |  |
| TH080                    | N233  | C7a        | 16223T 16298C 16327T                             | 73G 249D 263G 309.1C 315.1C             |  |
| TH081                    | C256  | C7         | 16093C 16172C 16223T 16298C 16327T               | 73G 249D 263G 309.1C 315.1C             |  |
| TH082                    | C260  | C4c1       | 16223T 16298C 16327T                             | 73G 189G 207A 249D 263G 315.1C          |  |
| TH083                    | C275  | C4a1       | 16129A 16148T 16223T 16298C 16327T               | 73G 152C 249D 263G 315.1C               |  |
| TH084                    | N290  | C7a2       | 16189C 16223T 16298C 16327T                      | 73G 207A 249D 263G 309.1C 315.1C        |  |
| TH085                    | C291  | C7a2       | 16223T 16298C 16327T                             | 73G 249D 263G 315.1C                    |  |
| TH086                    | C154  | M          | 16093C 16140C 16172C 16189C 16223T 16238C 16278T | 73G 249D 263G 309.1C 315.1C 319C        |  |
| TH087                    | N212  | C7a1       | 16223T 16274A 16327T                             | 73G 146C 195C 228T 249D 263G 315.1C     |  |
| TH088                    | N213  | C7a1       | 16223T 16263C 16298C 16327T                      | 73G 146C 195C 228A 249D 263G 315.1C     |  |
| TH089                    | N220  | C7a1       | 16223T 16263C 16298C 16327T                      | 73G 146C 195C 228A 249D 263G 315.1C     |  |
| TH090                    | C100  | D4j        | 16171G 16223T 16311C 16362C                      | 73G 228A 263G 309.1C 315.1C             |  |
| TH091                    | C4    | D4         | 16129A 16223T 16362C                             | 73G 152C 263G 315.1C                    |  |
| TH092                    | C14   | D4         | 16223T 16311C 16362C                             | 73G 152C 263G 269T 315.1C               |  |
| TH093                    | C29   | D4a        | 16129A 16223T 16249C 16278T 16311C 16362C        | 73G 152C 263G 309.1C 309.2C 315.1C      |  |
| TH094                    | N118  | R2         | 16071T 16126C 16362C                             | 73G 152C 263G 309.1C 315.1C             |  |
| TH095                    | NE128 | D6c        | 16189C 16223T 16294T 16311C 16362C               | 73G 152C 263G 309.1C 315.1C             |  |
| TH096                    | C174  | D4         | 16223T 16311C 16362C                             | 73G 152C 200G 263G 315.1C               |  |
| TH097                    | N246  | D4         | 16129A 16223T 16362C                             | 73G 146C 152C 263G 309.1C 315.1C        |  |
| TH098                    | S64   | D4b1       | 16185T 16189C 16223T 16232A 16319A 16362C        | 73G 263G 315.1C                         |  |
| TH099                    | C109  | D4b1       | 16185T 16189C 16223T 16232A 16319A 16362C        | 73G 263G 315.1C                         |  |
| TH100                    | C21   | F1a        | 16129A 16172C 16304C                             | 73G 249D 263G 315.1C                    |  |
| TH101                    | C25   | F1a        | 16172C 16304C                                    | 73G 249D 263G 309.1C 309.2C 315.1C      |  |
| TH102                    | S69   | F1a        | 16129A 16172C 16295T 16297C 16304C               | 73G 249D 263G 309.1C 315.1C             |  |
| TH103                    | N72   | F1a        | 16129A 16304C                                    | 73G 249D 263G 309.1C 309.2C 315.1C      |  |
| TH104                    | NE83  | F1a        | 16129A 16172C 16304C                             | 73G 249D 263G 315.1C                    |  |

| Region and mutation site |       |            |                                                         |                                            |
|--------------------------|-------|------------|---------------------------------------------------------|--------------------------------------------|
| No.                      | Code* | Haplogroup | 16024-16365 HV1                                         | 73-340 HV2                                 |
| TH105                    | NE94  | F1a        | 16172C 16304C                                           | 73G 200G 207A 249D 263G 309.1C 315.1C      |
| TH106                    | N117  | F1a        | 16129A 16172C 16192T 16304C                             | 73G 249D 263G 309.1C 309.2C 315.1C         |
| TH107                    | NE143 | F1a        | 16129A 16172C 16192T 16304C                             | 73G 249D 263G 315.1C                       |
| TH108                    | N199  | F1a        | 16092C 16129A 16172C 16304C                             | 73G 189G 204C 207A 249D 263G 309.1C 315.1C |
| TH109                    | N201  | F1a        | 16129A 16172C 16304C                                    | 73G 249D 263G 309.1C 315.1C                |
| TH110                    | N226  | F1a        | 16093C 16129A 16172C 16294T 16304C 16362C               | 73G 152C 249D 263G 309.1C 315.1C           |
| TH111                    | N234  | F1a        | 16129A 16172C 16304C 16320T                             | 73G 146C 195C 249D 263G 315.1C             |
| TH112                    | N244  | F1a        | 16129A 16172C 16304C                                    | 73G 249D 263G 309.1C 315.1C                |
| TH113                    | NE104 | F1a1       | 16129A 16162G 16172C 16304C                             | 73G 249D 263G 315.1C                       |
| TH114                    | N203  | F1a1       | 16093C 16129A 16162G 16168T 16172C 16304C               | 73G 249D 263G 309.1C 315.1C                |
| TH115                    | N286  | F1a1       | 16129A 16150T 16162G 16172C 16304C                      | 73G 249D 263G 315.1C                       |
| TH116                    | C296  | F1a1       | 16129A 16162G 16172C 16186T 16193T 16242T 16243C 16304C | 73G 151T 200G 249D 263G 309.1C 315.1C      |
| TH117                    | C3    | F1a1a      | 16108T 16129A 16162G 16172C 16304C                      | 73G 150T 195C 249D 263G 315.1C             |
| TH118                    | C6    | F1a1a      | 16108T 16129A 16162G 16172C 16304C                      | 73G 150T 195C 249D 263G 315.1C             |
| TH119                    | NE16  | F1a1a      | 16108T 16129A 16162G 16172C 16304C                      | 73G 249D 263G 309.1C 315.1C                |
| TH120                    | S35   | F1a1a      | 16108T 16129A 16162G 16172C 16304C                      | 73G 249D 263G 309.1C 315.1C                |
| TH121                    | S63   | F1a1a      | 16108T 16129A 16162G 16172C 16278T 16304C               | 73G 249D 263G 309.1C 315.1C                |
| TH122                    | NE93  | F1a1a      | 16108T 16129A 16162G 16172C 16304C                      | 73G 249D 263G 315.1C                       |
| TH123                    | C102  | F1a1a      | 16108T 16129A 16162G 16172C 16256T 16304C               | 73G 249D 263G 293C 309.1C 315.1C           |
| TH124                    | C114  | F1a1a      | 16108T 16129A 16162G 16172C 16304C                      | 73G 249D 263G 309.1C 315.1C                |
| TH125                    | NE129 | F1a1a      | 16108T 16129A 16162G 16172C 16284G 16304C               | 73G 185A 249D 263G 309.1C 315.1C           |
| TH126                    | NE144 | F1a1a      | 16108T 16129A 16162G 16172C 16304C                      | 73G 249D 263G 309.1C 315.1C                |
| TH127                    | NE156 | F1a1a      | 16108T 16129A 16162G 16172C 16304C                      | 73G 249D 263G 315.1C                       |
| TH128                    | C169  | F1a1a      | 16108T 16129A 16162G 16172C 16304C                      | 73G 183G 249D 263G 309.1C 315.1C           |
| TH129                    | C176  | F1a1a      | 16108T 16129A 16162G 16172C 16304C                      | 73G 152C 249D 263G 315.1C                  |
| TH130                    | N186  | F1a1a      | 16108T 16129A 16162G 16172C 16304C 16362C               | 73G 249D 263G 309.1C 315.1C                |
| TH131                    | N191  | F1a1a      | 16108T 16129A 16162G 16172C 16304C                      | 73G 249D 263G 309.1C 315.1C                |
| TH132                    | N209  | F1a1a      | 16108T 16129A 16162G 16172C 16270T 16304C               | 73G 249D 263G 315.1C                       |
| TH133                    | N210  | F1a1a      | 16108T 16129A 16162G 16172C 16270T 16304C               | 73G 249D 263G 315.1C                       |
| TH134                    | N217  | F1a1a      | 16108T 16129A 16162G 16172C 16270T 16304C               | 73G 249D 263G 315.1C                       |
| TH135                    | N219  | F1a1a      | 16108T 16129A 16162G 16172C 16270T 16304C               | 73G 200G 249D 263G 315.1C                  |
| TH136                    | N227  | F1a1a      | 16108T 16129A 16162G 16172C 16270T 16304C               | 73G 249D 263G 315.1C                       |
| TH137                    | N248  | F1a1a      | 16108T 16129A 16162G 16172C 16304C                      | 73G 152C 249D 261A 263G 309.1C 315.1C      |
| TH138                    | NE282 | F1a1a      | 16108T 16129A 16162G 16172C 16256T 16294T 16304C        | 73G 195C 249D 263G 309.1C 315.1C           |
| TH139                    | N289  | F1a1a      | 16108T 16129A 16162G 16172C 16304C                      | 73G 249D 263G 309.1C 315.1C                |
| TH140                    | NE297 | F1a1a      | 16108T 16129A 16162G 16172C 16256T 16304C               | 73G 249D 263G 293C 309.1C 315.1C           |

| Region and mutation site |       |            |                                                         |                                                        |  |
|--------------------------|-------|------------|---------------------------------------------------------|--------------------------------------------------------|--|
| No.                      | Code* | Haplogroup | 16024-16365 HV1                                         | 73-340 HV2                                             |  |
| TH141                    | N299  | F1a1a      | 16108T 16129A 16162G 16172C 16304C                      | 73G 249D 263G 315.1C 384G                              |  |
| TH142                    | C305  | F1a1a      | 16108T 16129A 16162G 16172C 16304C                      | 73G 152C 249D 263G 309.2C 315.1C                       |  |
| TH143                    | C121  | F1b1b      | 16172C 16183C 16189C 16232A 16249C 16304C 16311C        | 73G 152C 204C 215G 249D 263G 309.1C 309.2C 315.1C      |  |
| TH144                    | C262  | F1e3       | 16042A 16051G 16189C 16269G 16292T 16300G 16304C 16311C | 73G 150T 195C 234G 249D 263G 315.1C                    |  |
| TH145                    | C308  | F1c1a1     | 16111T 16129A 16266T 16304C                             | 73G 152C 249D 263G 309.1C 315.1C                       |  |
| TH146                    | C258  | F1d        | 16183C 16189C 16300G 16304C                             | 73G 146C 150T 195C 198T 249D 263G 309.1C 309.2C 315.1C |  |
| TH147                    | N237  | F2d        | rCRs                                                    | 73G 195C 235G 249D 263G 315.1C                         |  |
| TH148                    | C180  | G1a        | 16092C 16223T 16362C                                    | 73G 150T 263G 309.1C 315.1C                            |  |
| TH149                    | C1    | G1a1       | 16223T 16325C                                           | 73G 150T 263G 315.1C                                   |  |
| TH150                    | C178  | G1a2       | 16051G 16184T 16223T 16290T 16362C                      | 73G 263G 309.1C 315.1C                                 |  |
| TH151                    | S44   | G2a1d      | 16192T 16223T 16278T 16362C                             | 73G 260A 263G 309.1C 315.1C                            |  |
| TH152                    | S55   | M26        | 16214A 16223T 16278T                                    | 73G 152C 195C 204C 263G 309.1C 315.1C                  |  |
| TH153                    | N97   | G2a        | 16223T 16278T 16362C                                    | 73G 195C 263G 315.1C                                   |  |
| TH154                    | S134  | D4g1       | 16086C 16223T 16278T                                    | 73G 263G 309.1C 315.1C                                 |  |
| TH155                    | N214  | G2a        | 16223T 16278T 16362C                                    | 73G 195C 263G 315.1C                                   |  |
| TH156                    | N221  | G2a        | 16223T 16278T 16362C                                    | 73G 195C 263G 315.1C                                   |  |
| TH157                    | N223  | G2a        | 16223T 16278T 16362C                                    | 73G 195C 263G 315.1C                                   |  |
| TH158                    | N225  | G2a        | 16223T 16278T 16362C                                    | 73G 195C 263G 315.1C                                   |  |
| TH159                    | N231  | G2a        | 16223T 16278T 16362C                                    | 73G 195C 263G 315.1C                                   |  |
| TH160                    | S303  | M68a       | 16223T 16255A 16259T 16278T 16362C                      | 73G 263G 291D 292D 293D 294D 309.1C 315.1C             |  |
| TH161                    | S159  | M          | 16111T 16223T 16231C 16272G 16362C                      | 73G 263G 315.1C                                        |  |
| TH162                    | N229  | M26        | 16214A 16223T 16234T 16278T                             | 73G 152C 185A 189G 195C 263G 315.1C                    |  |
| TH163                    | N160  | M          | 16223T 16274A 16362C                                    | 73G 263G 309.1C 315.1C                                 |  |
| TH164                    | NE84  | M          | 16223T 16362C                                           | 73G 146C 210G 263G 309.1C 309.2C 315.1C 328G           |  |
| TH165                    | C111  | M          | 16223T 16362C                                           | 73G 263G 315.1C                                        |  |
| TH166                    | NE89  | N22        | 16168T 16223T 16249C                                    | 73G 146C 150T 177C 263G 315.1C                         |  |
| TH167                    | C142  | N22        | 16093C 16168T 16223T 16249C                             | 73G 177C 263G 315.1C                                   |  |
| TH168                    | N230  | M91a       | 16086C 16129A 16223T 16287T 16311C 16327A               | 73G 93G 200G 204C 263G 315.1C                          |  |
| TH169                    | S73   | M34a       | 16223T 16249C 16309G 16359C                             | 73G 114G 152C 263G 309.1C 315.1C                       |  |
| TH170                    | C150  | M17c1a1    | 16209C 16223T 16233G 16274A 16304C                      | 73G 143A 263G 291.1A 291.2A 291.3A 309.1C 315.1C       |  |
| TH171                    | N38   | M38        | 16189C 16223T 16256T                                    | 73G 239C 246C 263G 309.1C 315.1C                       |  |
| TH172                    | S125  | M38        | 16189C 16223T 16256T                                    | 73G 239C 246C 263G 309.1C 309.2C 315.1C                |  |
| TH173                    | S39   | M3a1       | 16126C 16223T                                           | 73G 146C 204C 248G 263G 309.1C 309.2C 315.1C           |  |
| TH174                    | S36   | M3c        | 16126C 16189C 16223T                                    | 73G 150T 152C 195C 263G 315.1C                         |  |
| TH175                    | NE67  | M          | 16093C 16223T 16311C 16362C                             | 73G 215G 263G 315.1C                                   |  |
| TH176                    | S70   | M7b1       | 16129A 16223T                                           | 73G 146C 150T 228A 263G 315.1C                         |  |

| Region and mutation site |       |            |                                                  |                                                   |
|--------------------------|-------|------------|--------------------------------------------------|---------------------------------------------------|
| No.                      | Code* | Haplogroup | 16024-16365 HV1                                  | 73-340 HV2                                        |
| TH177                    | NE75  | M7b1a1     | 16129A 16223T 16297C                             | 73G 150T 199C 263G 315.1C                         |
| TH178                    | NE88  | M7b1a1     | 16129A 16192T 16223T 16297C 16362C               | 73G 150T 199C 263G 309.1C 315.1C                  |
| TH179                    | C151  | M7b        | 16223T 16297C                                    | 73G 143A 263G 309.1C 315.1C                       |
| TH180                    | NE158 | M7b1a1     | 16129A 16192T 16223T 16297C                      | 73G 150T 199C 263G 309.1C 315.1C                  |
| TH181                    | NE171 | M5c1       | 16129A 16223T 16286T                             | 73G 146C 150T 263G 315.1C                         |
| TH182                    | C173  | M7b1a1     | 16129A 16192T 16223T 16297C                      | 73G 150T 157C 199C 263G 309.1C 315.1C             |
| TH183                    | C177  | M7b1a1     | 16129A 16223T 16297C                             | 73G 150T 199C 263G 315.1C                         |
| TH184                    | N208  | M7b1a1a    | 16129A 16189C 16192T 16223T 16297C               | 73G 150T 199C 263G 315.1C                         |
| TH185                    | N215  | M7b1a1     | 16129A 16192T 16223T 16297C 16311C               | 73G 150T 182T 199C 263G 309.1C 315.1C             |
| TH186                    | N224  | M7b1a1     | 16113C 16129A 16192T 16223T 16297C 16304C 16311C | 73G 150T 189G 199C 263G 309.1C 309.2C 315.1C      |
| TH187                    | NE254 | M7b1a1     | 16129A 16192T 16292T 16297C                      | 73G 150T 157C 199C 263G 315.1C 316A               |
| TH188                    | NE81  | M5c1       | 16086C 16223T                                    | 73G 150T 263G 309.1C 315.1C                       |
| TH189                    | N9    | M7b4       | 16223T 16297C                                    | 73G 150T 199C 204C 263G 315.1C                    |
| TH190                    | N13   | M7b4       | 16129A 16189C 16223T 16297C                      | 73G 150T 199C 204C 207A 263G 315.1C               |
| TH191                    | C76   | M7b4       | 16223T 16297C 16327T                             | 73G 150T 199C 204C 263G 315.1C                    |
| TH192                    | NE90  | M7b4       | 16129A 16192T 16223T 16297C                      | 73G 150T 199C 204C 263G 309.1C 315.1C             |
| TH193                    | NE95  | M7b4       | 16129A 16189C 16192T 16223T 16297C               | 73G 150T 199C 204C 263G 309.1C 309.2C 315.1C 332T |
| TH194                    | NE170 | M7b4       | 16223T 16297C                                    | 73G 150T 199C 204C 263G 315.1C                    |
| TH195                    | N242  | M7b4       | 16129A 16189C 16223T 16297C                      | 73G 150T 199C 204C 263G 315.1C                    |
| TH196                    | N249  | M7b4       | 16129A 16189C 16192T 16223T 16297C               | 73G 150T 199C 204C 207A 263G 315.1C               |
| TH197                    | NE292 | M7b4       | 16129A 16189C 16223T 16297C                      | 73G 150T 199C 204C 207A 263G 315.1C               |
| TH198                    | C5    | M7c        | 16174T 16223T 16316G 16362C                      | 73G 199C 263G 315.1C                              |
| TH199                    | C7    | M7c1       | 16223T                                           | 73G 146C 199C 263G 315.1C                         |
| TH200                    | S52   | M7c1       | 16223T 16295T 16362C                             | 73G 146C 199C 263G 309.1C 315.1C                  |
| TH201                    | S166  | M7c1       | 16223T 16278T 16354T                             | 73G 146C 199C 263G 309.1C 309.2C 315.1C           |
| TH202                    | N193  | M7c1       | rCRS                                             | 73G 146C 199C 204C 263G 309.1C 315.1C             |
| TH203                    | N207  | M7c1       | rCRs                                             | 73G 146C 199C 204C 263G 309.1C 315.1C             |
| TH204                    | N236  | M7c1       | rCRs                                             | 73G 146C 199C 263G 315.1C                         |
| TH205                    | C263  | M7c1       | rCRs                                             | 73G 146C 199C 263G 309.1C 315.1C                  |
| TH206                    | C307  | M7c1       | 16223T 16295T                                    | 73G 146C 152C 199C 263G 309.1C 315.1C             |
| TH207                    | N197  | M8a2a      | 16184T 16189C 16223T 16298C 16311C 16319A        | 73G 146C 150T 263G 309.1C 309.2C 315.1C           |
| TH208                    | N251  | M8a2a      | 16184T 16189C 16223T 16298C 16311C 16319A        | 73G 263G 309.1C 315.1C                            |
| TH209                    | NE270 | M9a        | 16158G 16223T 16234T 16362C                      | 73G 150T 152C 153G 263G 315.1C                    |
| TH210                    | S40   | M9a1a1c    | 16093C 16176T 16223T 16291T 16362C               | 73G 208C 263G 309.1C 315.1C                       |
| TH211                    | S47   | M9a1a1c    | 16189C 16223T 16291T 16362C                      | 73G 263G 309.1C 315.1C                            |
| TH212                    | S50   | M9a1a1c    | 16223T 16264T 16291T 16362C                      | 73G 263G 309.1C 315.1C                            |

| Region and mutation site |       |            |                                                  |                                                    |  |
|--------------------------|-------|------------|--------------------------------------------------|----------------------------------------------------|--|
| No.                      | Code* | Haplogroup | 16024-16365 HV1                                  | 73-340 HV2                                         |  |
| TH213                    | NE276 | M9b        | 16051G 16223T 16254G 16264T 16362C               | 73G 215G 263G 315.1C                               |  |
| TH214                    | C288  | M9b        | 16051G 16223T 16254G 16264T 16362C               | 73G 215G 263G 315.1C                               |  |
| TH215                    | C161  | M10        | 16051G 16223T 16311C 16319A                      | 73G 263G 315.1C                                    |  |
| TH216                    | NE165 | M10        | 16172C 16223T 16274A 16291T 16311C               | 73G 152C 263G 315.1C                               |  |
| TH217                    | C107  | M10a       | 16129A 16223T 16311C                             | 73G 263G 315.1C                                    |  |
| TH218                    | C273  | M10a       | 16129A 16223T 16287T 16311C 16327A               | 64T 73G 89C 93G 189G 200G 263G 309.1C 315.1C       |  |
| TH219                    | S145  | M10a1a     | 16093C 16223T 16311C                             | 73G 152C 263G 315.1C                               |  |
| TH220                    | C18   | M10a1a2    | 16111T 16223T 16311C                             | 73G 146C 152C 195C 263G 309.1C 315.1C              |  |
| TH221                    | S49   | M10a1a2    | 16092C 16172C 16223T 16311C                      | 73G 146C 263G 315.1C                               |  |
| TH222                    | S124  | M10a1a2    | 16092C 16172C 16223T 16311C                      | 73G 146C 263G 315.1C                               |  |
| TH223                    | C152  | M10a1a2    | 16223T 16311C                                    | 73G 146C 152C 195A 198T 263G 309.1C 315.1C         |  |
| TH224                    | NE164 | M10a1a2    | 16223T 16263C 16274A 16311C 16343G 16357C        | 73G 146C 263G 315.1C                               |  |
| TH225                    | C266  | M10a1a2    | 16145A 16223T 16311C                             | 73G 146C 214G 263G 309.1C 315.1C                   |  |
| TH226                    | C294  | M10a1a2    | 16172C 16223T 16291T 16311C                      | 73G 146C 263G 315.1C                               |  |
| TH227                    | S302  | M10a1a2    | 16172C 16223T 16274A 16311C                      | 73G 146C 263G 315.1C                               |  |
| TH228                    | C287  | M11        | 16223T                                           | 73G 195C 198T 200G 215G 263G 315.1C 318C 326G      |  |
| TH229                    | N205  | M12a1      | 16223T 16234T 16266T 16290T 16311C               | 73G 125C 127C 128T 146C 152C 263G 315.1C 318C 326G |  |
| TH230                    | N250  | M12a1      | 16223T 16234T 16290T 16362C                      | 73G 125C 127C 128T 263G 315.1C 318C                |  |
| TH231                    | C26   | M12b1b     | 16108T 16129A 16172C 16223T 16234T 16240G 16290T | 73G 185A 189G 195C 263G 309.1C 315.1C              |  |
| TH232                    | NE115 | M12b1b     | 16108T 16129A 16172C 16234T 16290T               | 73G 185A 189G 263G 309.1C 315.1C                   |  |
| TH233                    | NE175 | M12b1b     | 16108T 16129A 16172C 16223T 16234T 16290T        | 73G 185A 189G 263G 315.1C                          |  |
| TH234                    | S65   | N7a1       | 16051G 16063C 16129A 16166D 16172C 16223T 16318G | 73G 75A 152C 263G 279C 315.1C 316A                 |  |
| TH235                    | NE91  | M20        | 16129A 16181G 16209C 16223T 16272G               | 73G 152C 225A 228A 249D 263G 309.1C 315.1C 316A    |  |
| TH236                    | N135  | M20        | 16086C 16129A 16209C 16223T 16272G               | 73G 152C 225A 249D 263G 315.1C 316A                |  |
| TH237                    | N137  | M20        | 16086C 16129A 16209C 16223T 16272G               | 73G 152C 225A 249D 263G 315.1C 316A                |  |
| TH238                    | C255  | M20        | 16086C 16209C 16223T 16260T 16272G               | 73G 152C 225A 249D 263G 315.1C                     |  |
| TH239                    | S48   | M50a1      | 16129A 16153A 16223T 16263C 16309G               | 73G 204C 207A 263G 309.1C 309.2C 315.1C            |  |
| TH240                    | S155  | M50        | 16187T 16223T 16259T 16263C                      | 73G 152C 189G 207A 263G 315.1C                     |  |
| TH241                    | N200  | M71        | 16093C 16170G 16184T 16223T 16271C               | 73G 263G 309.1C 309.2C 315.1C                      |  |
| TH242                    | S57   | M71a1      | 16223T 16269G 16271C                             | 73G 150T 151T 263G 309.1C 315.1C                   |  |
| TH243                    | S113  | M71a1      | 16223T 16269G 16271C                             | 73G 150T 151T 263G 309.1C 315.1C                   |  |
| TH244                    | N190  | M71b       | 16223T 16260T 16264T 16271C                      | 73G 151T 263G 309.1C 309.2C 315.1C                 |  |
| TH245                    | C272  | M71a1      | 16223T 16242T 16269G 16271C                      | 73G 150T 151T 263G 309.1C 315.1C                   |  |
| TH246                    | S133  | M72        | 16166D 16214T 16223T                             | 73G 263G 315.1C                                    |  |
| TH247                    | C126  | N9a        | 16183C 16189C 16223T 16257A 16261T               | 73G 150T 263G 309.1C 315.1C                        |  |
| TH248                    | C153  | N9a        | 16223T 16257A 16311C                             | 73G 150T 263G 315.1C                               |  |

| Region and mutation site |       |            |                                                                |                                                      |
|--------------------------|-------|------------|----------------------------------------------------------------|------------------------------------------------------|
| No.                      | Code* | Haplogroup | 16024-16365 HV1                                                | 73-340 HV2                                           |
| TH249                    | N228  | N9a        | 16223T 16257A 16261T 16311C 16319A                             | 73G 150T 263G 309.1C 309.2C 315.1C                   |
| TH250                    | N252  | N9a        | 16223T 16257A 16261T 16311C                                    | 73G 150T 263G 309.1C 309.2C 315.1C                   |
| TH251                    | C311  | N9a        | 16223T 16257A 16261T 16311C                                    | 73G 150T 263G 309.1C 309.2C 315.1C                   |
| TH252                    | N240  | N9a1       | 16111T 16129A 16223T 16257A 16261T 16274A                      | 73G 150T 263G 309.1C 315.1C                          |
| TH253                    | NE80  | N9a6       | 16153A 16223T 16257A 16261T 16292T                             | 73G 150T 263G 315.1C                                 |
| TH254                    | NE87  | N9a6       | 16223T 16247G 16257A 16261T 16292T                             | 73G 150T 263G 315.1C                                 |
| TH255                    | N138  | N10a       | 16172C 16183C 16189C 16223T 16362C                             | 73G 185A 189G 263G 309.1C 315.1C                     |
| TH256                    | N216  | N10a       | 16172C 16183C 16189C 16223T 16362C                             | 73G 185A 189G 263G 309.1C 315.1C                     |
| TH257                    | N232  | N10a       | 16183C 16189C 16193T 16223T 16362C                             | 73G 150T 185A 309.1C 309.2C 315.1C                   |
| TH258                    | C278  | N10a       | 16158G 16172C 16183C 16189C 16223T 16362C                      | 73G 185A 189G 263G 309.1C 309.2C 315.1C              |
| TH259                    | C316  | N10a       | 16172C 16183C 16219T 16223A 16362C                             | 73G 185A 189G 263G 309.1C 315.1C                     |
| TH260                    | C15   | M68a       | 16223T 16259T 16278T 16291T 16362C                             | 73G 185A 188G 263G 291D 292D 293D 294D 309.1C 315.1C |
| TH261                    | N96   | M68a       | 16223T 16259T 16278T 16291T 16362C                             | 73G 185A 188G 263G 291D 292D 293D 294D 309.1C 315.1C |
| TH262                    | N110  | N10b       | 16069T 16172C 16223T 16271C 16274A 16278T 16291A 16298C 16362C | 73G 150T 199C 263G 309.1C 315.1C                     |
| TH263                    | S37   | N11a       | 16129A 16193T 16223T 16355T                                    | 73G 195C 263G 309.1C 309.2C 315.1C                   |
| TH264                    | NE99  | N21        | 16124C 16193T 16223T                                           | 73G 150T 195C 263G 315.1C 337D                       |
| TH265                    | S283  | U7a        | 16207G 16309G 16318T                                           | 73G 151T 152C 263G 315.1C                            |
| TH266                    | S43   | R5a        | 16166G 16192T 16266T 16304C 16311C                             | 73G 93G 263G 309.1C 315.1C                           |
| TH267                    | N139  | R9b1a      | 16192T 16304C 16309G                                           | 73G 263G 309.1C 315.1C                               |
| TH268                    | C183  | R9b1a      | 16304C 16309G                                                  | 73G 183G 263G 315.1C                                 |
| TH269                    | C12   | R9b1a1a    | 16192T 16274A 16288C 16304C                                    | 73G 183G 263G 309.1C 315.1C                          |
| TH270                    | C20   | R9b1a1a    | 16192T 16274A 16288C 16304C                                    | 73G 143A 183G 263G 309.1C 315.1C                     |
| TH271                    | S61   | R9b1a1a    | 16086C 16170G 16223T 16288C 16304C 16309G                      | 73G 143A 152C 183G 263G 309.1C 315.1C                |
| TH272                    | NE101 | R9b1a1a    | 16288C 16304C 16309G                                           | 73G 143A 146C 183G 204C 263G 309.1C 315.1C           |
| TH273                    | N119  | R9b1a1a    | 16288C 16304C 16309G                                           | 73G 143A 183G 259G 263G 309.1C 315.1C                |
| TH274                    | N235  | R9b1a1a    | 16192T 16288C 16304C 16309G 16320T                             | 73G 143A 183G 263G 315.1C                            |
| TH275                    | C293  | R9b1a1a    | 16192T 16274A 16288C 16304C 16309G                             | 73G 143A 183G 263G 309.1C 315.1C                     |
| TH276                    | S301  | R9b1a1a    | 16192T 16288C 16304C 16309G                                    | 73G 143A 183G 263G 309.1C 315.1C                     |
| TH277                    | NE11  | M21d       | 16145A 16181G 16192T 16223T 16291T 16304C                      | 73G 210G 263G 309.1C 315.1C                          |
| TH278                    | NE46  | M21d       | 16145A 16181G 16192T 16223T 16291T 16304C                      | 73G 210G 263G 315.1C                                 |
| TH279                    | S66   | M21d       | 16145A 16181G 16192T 16223T 16291T 16304C                      | 73G 210G 263G 309.1C 315.1C                          |
| TH280                    | C163  | M21d       | 16145A 16181G 16192T 16223T 16291T 16304C                      | 73G 189G 210G 263G 309.1C 309.2C 315.1C              |
| TH281                    | N19   | R9b2       | 16304C 16362C                                                  | 73G 199C 263G 315.1C                                 |
| TH282                    | S31   | R9b2       | 16304C 16325C 16362C                                           | 73G 263G 315.1C                                      |
| TH283                    | N245  | R9b2       | 16223T 16304C 16344T 16362C                                    | 73G 263G 309.1C 315.1C                               |
| TH284                    | C259  | R9b2       | 16304C 16362C                                                  | 73G 146C 263G 315.1C                                 |



| Region and mutation site |              |              |                                                  |                                                        |
|--------------------------|--------------|--------------|--------------------------------------------------|--------------------------------------------------------|
| No.                      | Code*        | Haplogroup   | 16024-16365 HV1                                  | 73-340 HV2                                             |
| TH285                    | <b>C271</b>  | <b>R9b2</b>  | 16304C 16362C                                    | 73G 263G 309.1C 315.1C                                 |
| TH286                    | <b>C284</b>  | <b>R9b2</b>  | 16092C 16304C 16362C                             | 73G 263G 315.1C                                        |
| TH287                    | <b>NE295</b> | <b>R9b2</b>  | 16304C 16362C                                    | 73G 152C 263G 315.1C                                   |
| TH288                    | <b>S309</b>  | <b>R9b2</b>  | 16124C 16304C 16362C                             | 73G 263G 309.1C 309.2C 315.1C                          |
| TH289                    | <b>N2</b>    | <b>R9c</b>   | 16304C                                           | 73G 249D 263G 315.1C                                   |
| TH290                    | <b>N202</b>  | <b>R9c</b>   | 16304C                                           | 73G 249D 263G 309.1C 315.1C                            |
| TH291                    | <b>C261</b>  | <b>R9c</b>   | 16209C 16304C                                    | 73G 249D 263G 309.2C 315.1C                            |
| TH292                    | <b>C277</b>  | <b>R9c</b>   | 16304C                                           | 73G 249D 263G 315.1C                                   |
| TH293                    | <b>C315</b>  | <b>R9c</b>   | 16304C                                           | 73G 249D 263G 309.1C 315.1C                            |
| TH294                    | <b>N10</b>   | <b>R9c1</b>  | 16093C 16157C 16304C                             | 73G 146C 151T 263G 309.1C 315.1C                       |
| TH295                    | <b>N192</b>  | <b>R9c1</b>  | 16157C 16304C                                    | 73G 152C 228A 263G 315.1C                              |
| TH296                    | <b>NE92</b>  | <b>R9c1a</b> | 16157C 16256T 16304C 16335G                      | 73G 249D 263G 315.1C                                   |
| TH297                    | <b>S172</b>  | <b>R11</b>   | 16182C 16183C 16189C 16311C                      | 73G 189G 195A 263G 309.1C 315.1C                       |
| TH298                    | <b>S45</b>   | <b>R22</b>   | 16249C 16288C 16317C                             | 73G 195C 263G 315.1C 329A                              |
| TH299                    | <b>C116</b>  | <b>R22</b>   | 16213A 16232T 16249C 16266T 16288C 16295T 16304C | 73G 146C 152C 185A 189G 263G 309.1C 309.2C 315.1C 329A |
| TH300                    | <b>S123</b>  | <b>R22</b>   | 16249C 16288C 16301T 16304C 16357C               | 73G 152C 263G 315.1C 329A                              |
| TH301                    | <b>C267</b>  | <b>R22</b>   | 16249C 16288C 16304C                             | 73G 263G 309.1C 315.1C 329A                            |
| TH302                    | <b>S58</b>   | <b>Y2</b>    | 16126C 16231C 16311C                             | 73G 143A 228A 263G 309.1C 315.1C                       |
| TH303                    | <b>S257</b>  | <b>F4b</b>   | 16218T 16311C                                    | 73G 185A 249D 263G 309.1C 315.1C                       |
| TH304                    | <b>C146</b>  | <b>Z</b>     | 16185T 16223T 16260T 16298C                      | 73G 152C 249D 263G 309.1C 315.1C                       |
| TH305                    | <b>S59</b>   | <b>F3a1</b>  | 16145A 16260T 16298C 16355T 16362C               | 73G 207A 249D 263G 309.1C 315.1C                       |
| TH306                    | <b>N71</b>   | <b>F3a1</b>  | 16260T 16298C 16355T 16362C                      | 73G 207A 249D 263G 309.1C 315.1C                       |
| TH307                    | <b>C77</b>   | <b>F3a</b>   | 16111T 16192T 16249C 16263C 16298C 16355T 16362C | 73G 207A 249D 263G 309.1C 309.2C 315.1C                |
| TH308                    | <b>NE98</b>  | <b>F3a1</b>  | 16260T 16298C 16355T 16362C                      | 73G 207A 249D 263G 309.1C 315.1C                       |
| TH309                    | <b>N185</b>  | <b>F3a1</b>  | 16260T 16298C 16355T 16362C                      | 73G 152C 207A 249D 263G 309.1C 315.1C                  |

\*

N: Chiang Rai, Nan, Phayao, Chiang Mai, Mae Hong Son, Phrae, Lampang, Lamphun and Uttaradit

NE: Nong Khai, Nakhon Phanom, Sakon Nakhon, Udon Thani, Nong Bua Lamphu, Loei, Mukdahan, Kalasin, Khon Kaen, Amnat Charoen, Yasothorn, Roi Et, Maha Sarakham, Chaiyaphum, Nakhon Ratchasima, Buri Ram, Surin, Sisaket and Ubon Ratchathani

C: Phitsanulok, Sukhothai, Phetchabun, Phichit, Kamphaeng Phet, Nakhon Sawan, Lop Buri, Chai Nat, Uthai Thani, Sing Buri, Ang Thong, Saraburi, Phra Nakhon Si Ayutthaya, Suphan Buri, Nakhon Nayok, Pathum Thani, Nonthaburi, Nakhon Pathom, Samut Prakan, Samut Sakhon and Samut Songkhram

S: Chumphon, Ranong, Surat Thani, Nakhon Si Thammarat, Krabi, Phang Nga, Phuket, Phatthalung, Trang, Pattani, Songkhla, Satun, Narathiwat and Yala

**Table S2** Haplogroup frequencies in Thailand and other Asian populations.

| Haplogroup | Thailand<br>(present<br>study)<br>(n=309) | Cambodia<br>Zhang et<br>al. (2013)<br>(n=1054) | Indonesia<br>Mona et<br>al. (2009)<br>(n=330) | Myanmar<br>Summerer<br>et al.<br>(2014)<br>(n=327) | Philippines<br>Tabbada<br>et al.<br>(2010)<br>(n=423) | Malaysia<br>Maruyama<br>et al.<br>(2010)<br>(n=124) | Singapore<br>Shee et al.<br>(2005)<br>(n=100) | Vietnam<br>Li et al.<br>(2007)<br>(n=73) | Japan<br>Maruyama<br>et al.<br>(2013)<br>(n=270) | Korea<br>Lee et<br>al.<br>(2006)<br>(n=593) | China<br>Yao et<br>al.<br>(2002)<br>(n=251) | Nepal<br>Fornarino<br>et al.<br>(2009)<br>(n=173) | India<br>Fornarino<br>et al.<br>(2009)<br>(n=101) |
|------------|-------------------------------------------|------------------------------------------------|-----------------------------------------------|----------------------------------------------------|-------------------------------------------------------|-----------------------------------------------------|-----------------------------------------------|------------------------------------------|--------------------------------------------------|---------------------------------------------|---------------------------------------------|---------------------------------------------------|---------------------------------------------------|
| A          | 0.32                                      | ...                                            | ...                                           | ...                                                | ...                                                   | ...                                                 | 9                                             | ...                                      | 0.74                                             | 2.19                                        | 7.17                                        | ...                                               | ...                                               |
| A4         | 1.62                                      | ...                                            | ...                                           | 4.59                                               | ...                                                   | ...                                                 | ...                                           | ...                                      | ...                                              | 3.04                                        | ...                                         | ...                                               | ...                                               |
| A4d        | 0.32                                      | ...                                            | ...                                           | 0.61                                               | ...                                                   | ...                                                 | ...                                           | ...                                      | ...                                              | ...                                         | ...                                         | ...                                               | ...                                               |
| A5b        | 0.32                                      | ...                                            | ...                                           | ...                                                | ...                                                   | ...                                                 | ...                                           | ...                                      | ...                                              | ...                                         | ...                                         | ...                                               | ...                                               |
| B2g        | 0.32                                      | ...                                            | ...                                           | ...                                                | ...                                                   | ...                                                 | ...                                           | ...                                      | ...                                              | ...                                         | ...                                         | ...                                               | ...                                               |
| B4         | 0.32                                      | 0.09                                           | ...                                           | ...                                                | ...                                                   | ...                                                 | ...                                           | 6.85                                     | ...                                              | 4.05                                        | 2.39                                        | ...                                               | ...                                               |
| B4a        | 2.91                                      | 0.09                                           | 3.64                                          | 0.61                                               | 11.82                                                 | 3.23                                                | 3                                             | 4.11                                     | 1.48                                             | 3.71                                        | 4.78                                        | ...                                               | ...                                               |
| B4b        | 0.97                                      | 0.28                                           | 7.27                                          | ...                                                | 7.57                                                  | 2.42                                                | 1                                             | ...                                      | 2.59                                             | 3.37                                        | 3.59                                        | ...                                               | ...                                               |
| B4c        | 3.56                                      | 5.12                                           | 3.64                                          | 1.22                                               | 4.96                                                  | 9.68                                                | ...                                           | ...                                      | 3.7                                              | ...                                         | ...                                         | ...                                               | ...                                               |
| B4g        | 1.29                                      | ...                                            | ...                                           | ...                                                | ...                                                   | ...                                                 | ...                                           | ...                                      | ...                                              | ...                                         | ...                                         | ...                                               | ...                                               |
| B5a        | 8.41                                      | 27.32                                          | 0.61                                          | 3.67                                               | 0.71                                                  | 4.84                                                | 5                                             | 5.48                                     | 0.74                                             | 1.52                                        | 2.39                                        | 4.62                                              | ...                                               |
| B5b        | 0.65                                      | 0.76                                           | 3.94                                          | ...                                                | 7.8                                                   | 0.81                                                | 2                                             | ...                                      | 2.22                                             | 3.04                                        | 1.59                                        | ...                                               | ...                                               |
| B6a        | 0.32                                      | ...                                            | ...                                           | 1.83                                               | ...                                                   | ...                                                 | ...                                           | ...                                      | ...                                              | ...                                         | ...                                         | ...                                               | ...                                               |
| C4a        | 0.97                                      | ...                                            | ...                                           | 1.22                                               | ...                                                   | ...                                                 | ...                                           | ...                                      | ...                                              | ...                                         | ...                                         | ...                                               | ...                                               |
| C4c        | 0.32                                      | ...                                            | ...                                           | 0.31                                               | ...                                                   | ...                                                 | ...                                           | ...                                      | ...                                              | ...                                         | ...                                         | ...                                               | ...                                               |
| C7         | 0.65                                      | ...                                            | ...                                           | ...                                                | ...                                                   | ...                                                 | ...                                           | ...                                      | ...                                              | ...                                         | ...                                         | ...                                               | ...                                               |
| C7a        | 2.59                                      | ...                                            | ...                                           | ...                                                | ...                                                   | ...                                                 | ...                                           | ...                                      | ...                                              | ...                                         | ...                                         | ...                                               | ...                                               |
| D4         | 1.29                                      | ...                                            | ...                                           | 0.31                                               | ...                                                   | 0.81                                                | ...                                           | ...                                      | 4.07                                             | 15.68                                       | 10.76                                       | 5.2                                               | 0.99                                              |
| D4a        | 0.32                                      | 0.09                                           | ...                                           | 0.92                                               | ...                                                   | 1.61                                                | 2                                             | ...                                      | 6.67                                             | 5.06                                        | 2.79                                        | ...                                               | ...                                               |
| D4b        | 0.65                                      | ...                                            | ...                                           | 1.22                                               | ...                                                   | ...                                                 | 5                                             | ...                                      | 5.18                                             | 5.06                                        | 0.8                                         | ...                                               | ...                                               |
| D4g        | 0.32                                      | ...                                            | ...                                           | 0.61                                               | ...                                                   | ...                                                 | ...                                           | ...                                      | 2.22                                             | ...                                         | ...                                         | ...                                               | ...                                               |
| D4j        | 0.32                                      | ...                                            | ...                                           | 1.53                                               | ...                                                   | ...                                                 | ...                                           | ...                                      | 0.74                                             | ...                                         | ...                                         | 2.89                                              | ...                                               |
| D5         | 0.32                                      | 0.09                                           | ...                                           | ...                                                | ...                                                   | 0.81                                                | ...                                           | ...                                      | ...                                              | 0.51                                        | 2.79                                        | ...                                               | ...                                               |
| D5b        | 0.65                                      | ...                                            | ...                                           | ...                                                | 0.47                                                  | ...                                                 | ...                                           | ...                                      | 2.59                                             | 2.7                                         | ...                                         | ...                                               | ...                                               |
| D6c        | 0.32                                      | ...                                            | ...                                           | ...                                                | ...                                                   | ...                                                 | ...                                           | ...                                      | ...                                              | ...                                         | ...                                         | ...                                               | ...                                               |
| F1a        | 13.92                                     | 17.84                                          | 14.24                                         | 21.71                                              | 7.57                                                  | 14.52                                               | 8                                             | 24.66                                    | 2.22                                             | 2.19                                        | 5.98                                        | ...                                               | ...                                               |
| F1b        | 0.32                                      | ...                                            | ...                                           | ...                                                | ...                                                   | ...                                                 | ...                                           | 1.37                                     | 2.96                                             | 2.7                                         | 3.19                                        | ...                                               | ...                                               |

[illegible]

| Haplogroup | Thailand<br>(present<br>study)<br>(n=309) | Cambodia<br>Zhang et<br>al. (2013)<br>(n=1054) | Indonesia<br>Mona et<br>al. (2009)<br>(n=330) | Myanmar<br>Summerer<br>et al.<br>(2014)<br>(n=327) | Philippines<br>Tabbada<br>et al.<br>(2010)<br>(n=423) | Malaysia<br>Maruyama<br>et al.<br>(2010)<br>(n=124) | Singapore<br>Shee et al.<br>(2005)<br>(n=100) | Vietnam<br>Li et al.<br>(2007)<br>(n=73) | Japan<br>Maruyama<br>et al.<br>(2013)<br>(n=270) | Korea<br>Lee et<br>al.<br>(2006)<br>(n=593) | China<br>Yao et<br>al.<br>(2002)<br>(n=251) | Nepal<br>Fornarino<br>et al.<br>(2009)<br>(n=173) | India<br>Fornarino<br>et al.<br>(2009)<br>(n=101) |
|------------|-------------------------------------------|------------------------------------------------|-----------------------------------------------|----------------------------------------------------|-------------------------------------------------------|-----------------------------------------------------|-----------------------------------------------|------------------------------------------|--------------------------------------------------|---------------------------------------------|---------------------------------------------|---------------------------------------------------|---------------------------------------------------|
| M38        | 0.65                                      | ...                                            | ...                                           | 0.31                                               | ...                                                   | ...                                                 | ...                                           | ...                                      | ...                                              | ...                                         | ...                                         | 5.2                                               | 0.99                                              |
| M50        | 0.32                                      | ...                                            | ...                                           | 0.31                                               | ...                                                   | ...                                                 | ...                                           | ...                                      | ...                                              | ...                                         | ...                                         | ...                                               | ...                                               |
| M50a       | 0.32                                      | ...                                            | ...                                           | ...                                                | ...                                                   | ...                                                 | ...                                           | ...                                      | ...                                              | ...                                         | ...                                         | ...                                               | ...                                               |
| M51a       | 0.32                                      | 0.66                                           | ...                                           | ...                                                | ...                                                   | ...                                                 | ...                                           | ...                                      | ...                                              | ...                                         | ...                                         | ...                                               | ...                                               |
| M68a       | 0.97                                      | 1.23                                           | ...                                           | ...                                                | ...                                                   | ...                                                 | ...                                           | ...                                      | ...                                              | ...                                         | ...                                         | ...                                               | ...                                               |
| M71        | 0.32                                      | 0.85                                           | ...                                           | 0.61                                               | ...                                                   | ...                                                 | ...                                           | ...                                      | ...                                              | ...                                         | ...                                         | ...                                               | ...                                               |
| M71a       | 0.97                                      | 0.19                                           | ...                                           | 0.31                                               | ...                                                   | ...                                                 | ...                                           | ...                                      | ...                                              | ...                                         | ...                                         | ...                                               | ...                                               |
| M71b       | 0.32                                      | ...                                            | ...                                           | ...                                                | ...                                                   | ...                                                 | ...                                           | ...                                      | ...                                              | ...                                         | ...                                         | ...                                               | ...                                               |
| M72        | 0.32                                      | 0.38                                           | ...                                           | 0.61                                               | ...                                                   | ...                                                 | ...                                           | ...                                      | ...                                              | ...                                         | ...                                         | ...                                               | ...                                               |
| M91a       | 0.32                                      | ...                                            | ...                                           | ...                                                | ...                                                   | ...                                                 | ...                                           | ...                                      | ...                                              | ...                                         | ...                                         | ...                                               | ...                                               |
| N7a        | 0.32                                      | ...                                            | ...                                           | ...                                                | ...                                                   | ...                                                 | ...                                           | ...                                      | ...                                              | ...                                         | ...                                         | ...                                               | ...                                               |
| N9a        | 2.59                                      | 1.04                                           | ...                                           | 0.31                                               | ...                                                   | 1.61                                                | 3                                             | ...                                      | 2.96                                             | 7.25                                        | 4.78                                        | ...                                               | ...                                               |
| N10a       | 1.62                                      | 0.09                                           | ...                                           | ...                                                | ...                                                   | ...                                                 | ...                                           | ...                                      | ...                                              | ...                                         | ...                                         | ...                                               | ...                                               |
| N10b       | 0.32                                      | ...                                            | ...                                           | ...                                                | ...                                                   | ...                                                 | ...                                           | ...                                      | ...                                              | ...                                         | ...                                         | ...                                               | ...                                               |
| N11a       | 0.32                                      | ...                                            | ...                                           | ...                                                | ...                                                   | ...                                                 | ...                                           | ...                                      | ...                                              | ...                                         | ...                                         | ...                                               | ...                                               |
| N21        | 0.32                                      | 2.94                                           | ...                                           | ...                                                | ...                                                   | 1.61                                                | ...                                           | ...                                      | ...                                              | ...                                         | ...                                         | ...                                               | ...                                               |
| N22        | 0.65                                      | ...                                            | ...                                           | ...                                                | 0.24                                                  | 0.81                                                | ...                                           | ...                                      | ...                                              | ...                                         | ...                                         | ...                                               | ...                                               |
| R2         | 0.32                                      | ...                                            | ...                                           | ...                                                | ...                                                   | ...                                                 | ...                                           | ...                                      | ...                                              | ...                                         | ...                                         | ...                                               | 0.99                                              |
| R5a        | 0.32                                      | ...                                            | ...                                           | ...                                                | ...                                                   | ...                                                 | ...                                           | ...                                      | ...                                              | ...                                         | ...                                         | ...                                               | 1.98                                              |
| R9b        | 5.83                                      | 2.37                                           | ...                                           | 5.2                                                | ...                                                   | 3.23                                                | ...                                           | 6.85                                     | ...                                              | ...                                         | ...                                         | ...                                               | ...                                               |
| R9c        | 2.59                                      | ...                                            | 3.64                                          | 0.31                                               | 4.96                                                  | ...                                                 | ...                                           | ...                                      | ...                                              | ...                                         | ...                                         | ...                                               | ...                                               |
| R11        | 0.32                                      | ...                                            | ...                                           | 0.31                                               | ...                                                   | ...                                                 | ...                                           | ...                                      | ...                                              | 0.34                                        | ...                                         | ...                                               | ...                                               |
| R22        | 1.29                                      | 5.79                                           | ...                                           | 0.31                                               | ...                                                   | 0.81                                                | ...                                           | ...                                      | ...                                              | ...                                         | ...                                         | ...                                               | ...                                               |
| U7a        | 0.32                                      | ...                                            | ...                                           | ...                                                | ...                                                   | ...                                                 | ...                                           | ...                                      | ...                                              | ...                                         | ...                                         | ...                                               | ...                                               |
| Y2         | 0.32                                      | ...                                            | 0.3                                           | 0.31                                               | 4.73                                                  | 0.81                                                | ...                                           | ...                                      | 0.37                                             | ...                                         | ...                                         | ...                                               | ...                                               |
| Z          | 0.32                                      | ...                                            | ...                                           | 0.31                                               | ...                                                   | ...                                                 | 2                                             | ...                                      | 0.37                                             | 0.84                                        | 1.99                                        | 2.31                                              | ...                                               |

## References

- Fornarino S et al (2009) Mitochondrial and Y-chromosome diversity of the Tharus (Nepal): a reservoir of genetic variation. *BMC Evol Biol* 9:154. <https://doi.org/10.1186/1471-2148-9-154>.
- Lee HY, Yoo JE, Park MJ, Chung U, Shin KJ (2006) Mitochondrial DNA control region sequences in Koreans: identification of useful variable sites and phylogenetic analysis for mtDNA data quality control. *Int J Legal Med* 120:5–14.
- Li H et al (2007) Mitochondrial DNA diversity and population differentiation in southern East Asia. *Am J Phys Anthropol* 134:481–488. <https://doi.org/10.1002/ajpa.20690>
- Maruyama S, Komuro T, Izawa H, Tsutsumi H (2013) Analysis of human mitochondrial DNA polymorphisms in the Japanese population. *Biochem Genet* 51:33–70.
- Maruyama S, Nohira-Koike C, Minaguchi K, Nambiar P (2010) MtDNA control region sequence polymorphisms and phylogenetic analysis of Malay population living in or around Kuala Lumpur in Malaysia. *Int J Legal Med* 124:165–170.
- Mona S et al (2009) Genetic admixture history of Eastern Indonesia as revealed by Y-chromosome and mitochondrial DNA analysis. *Mol Biol Evol* 26:1865–1877.
- Shee C-Y, Chong MSM, Ng I, Chia T-F (2005) Mitochondrial DNA hypervariable region 1 polymorphism in Singapore Chinese population. *Leg Med* 7:127–133.
- Summerer M et al (2014) Large-scale mitochondrial DNA analysis in Southeast Asia reveals evolutionary effects of cultural isolation in the multi-ethnic population of Myanmar. *BMC Evol Biol* 14:17.
- Tabbada KA et al (2010) Philippine mitochondrial DNA diversity: a populated viaduct between Taiwan and Indonesia?. *Mol Biol Evol* 27:21–31.
- Yao Y-G, Kong Q-P, Bandelt H-J, Kivisild T, Zhang Y-P (2002) Phylogeographic differentiation of mitochondrial DNA in Han Chinese. *Am J Hum Genet* 70:635–651.
- Zhang X et al (2013) Analysis of mitochondrial genome diversity identifies new and ancient maternal lineages in Cambodian aborigines. *Nat Commun* 4.
